# Supplementary material for: PEO/cysteine composite nanofiber-based triboelectric nanogenerators for harvesting tiny mechanical energy
Source: Royal Society of Chemistry journal article supplement (doi:10.1039/d4ta06845a), 2024-11-12
Supplement: d4ta06845a1.pdf [file d4ta06845a1.pdf]

*Supporting Information*

**PEO/cysteine composite nanofiber-based triboelectric nanogenerator for tiny  
mechanical energy harvesting**

Yijun Hao<sup>1</sup>, Jiayi Yang<sup>1</sup>, Xiaopeng Zhu<sup>1</sup>, Keke Hong<sup>1</sup>, Jiayu Su<sup>1</sup>, Yong Qin<sup>2</sup>, Wei Su<sup>1</sup>,  
Hongke Zhang<sup>1</sup>, Chuguo Zhang<sup>1,\*</sup>, and Xiuhan Li<sup>1,\*</sup>

*1. School of Electronic and Information Engineering, Beijing Jiaotong University,  
Beijing, 100044, P.R. China*

*2. State Key Laboratory of Rail Traffic Control and Safety, Beijing Jiaotong University,  
Beijing, 100044, P.R. China*

*\*Corresponding author. E-mail: [cgzhang@bjtu.edu.cn](mailto:cgzhang@bjtu.edu.cn); [lixuhan@bjtu.edu.cn](mailto:lixuhan@bjtu.edu.cn)*

## Supplementary Figures

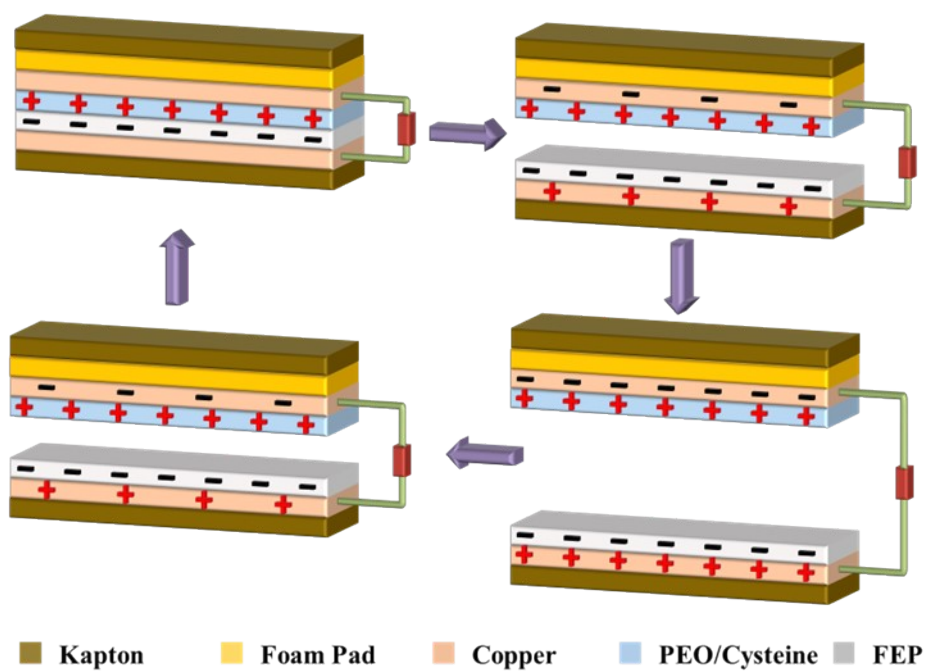

**Fig. S1 Working mechanism of TENG.**

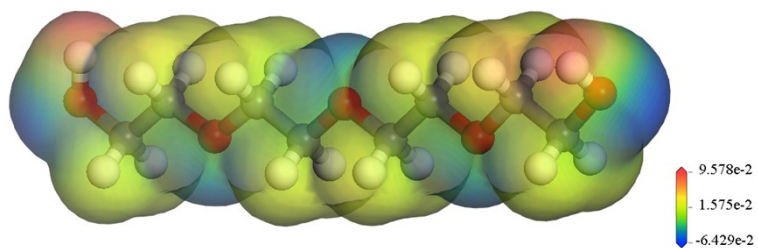

**Fig. S2 PEO molecule simulation.** Red and blue areas are corresponding to potential.

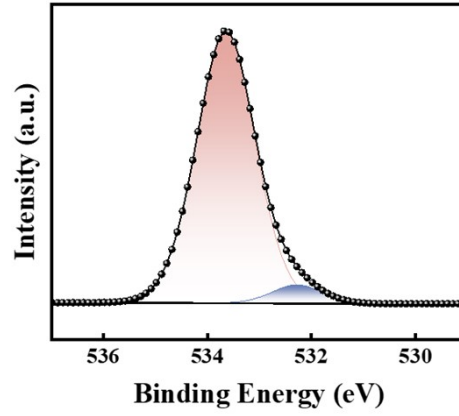

**Fig. S3 O 1s core-shell spectra of PCF.**

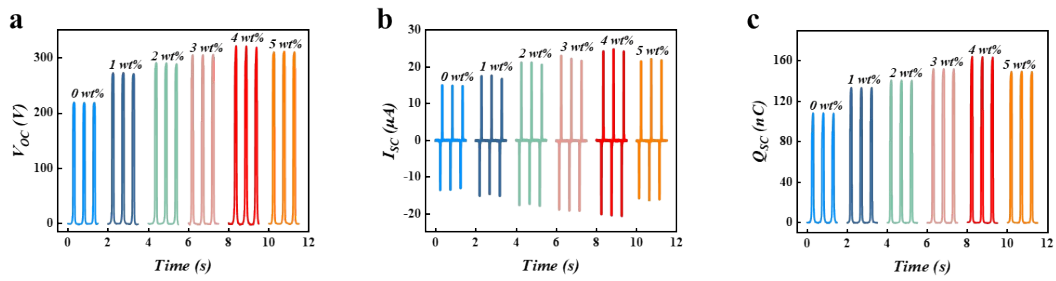

**Fig. S4 PC-TENG' s electrical performance testing.** (a)  $V_{OC}$ , (b)  $I_{SC}$ , and (c)  $Q_{SC}$  of the PC-TENG with varying cysteine mass percentages.

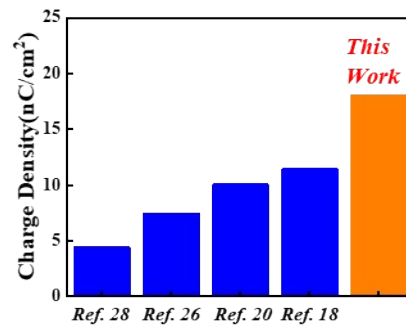

**Fig. S5 Surface transferred charge density of PC-TENG and previous biodegradable material-based TENGs.**

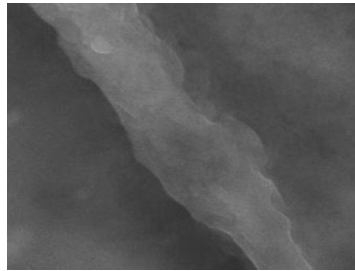

**Fig. S6 SEM of single PCF fiber with 5 wt% cysteine.**

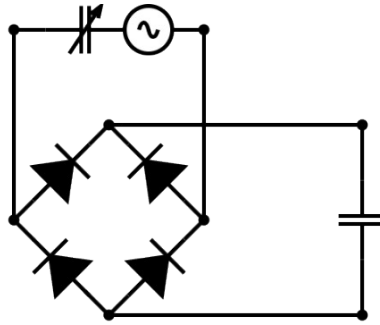

Fig. S7 Full-wave rectification circuit.

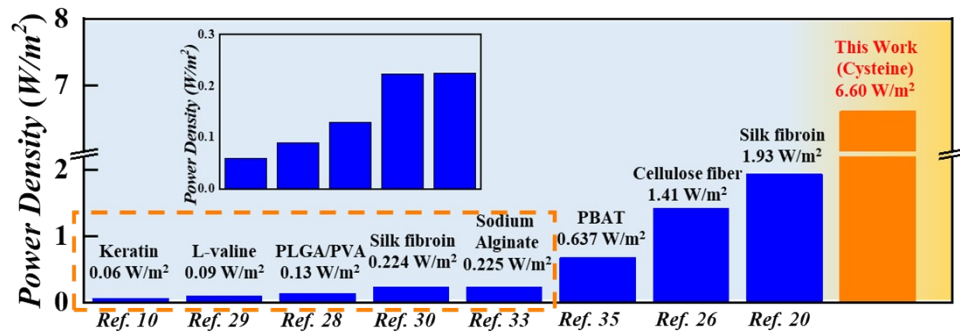

Fig. S8 Power density of PC-TENG and previous biodegradable material-based TENGs.

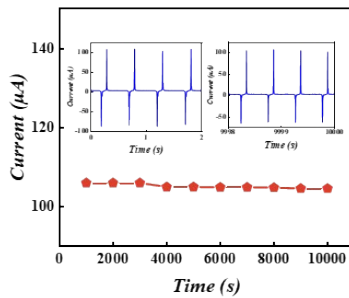

Fig. S9 10 k cycles stability test of MF-TENG.

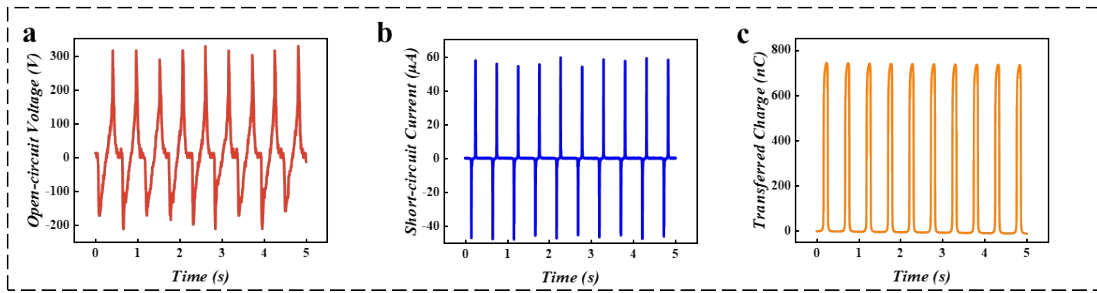

**Fig. S10 MF-TENG electrical output by clapping.**

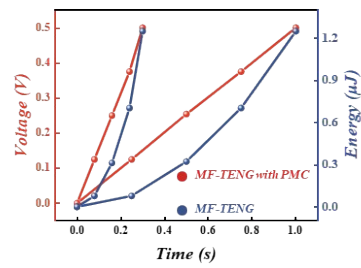

**Fig. S11 Bio-mechanical power collected by MF-TENG with/without PM circuit.**

**Note S1: Related information about MF-TENG**

The length from the first layer to the fourth layer is 2, 3, 4, 5 cm respectively, and the width of the device is 5 cm. When the device is placed on the ground, the angle with the ground is  $45^\circ$ .
